# Supplementary material
Source: PubMed Central journal article supplement (PMC4012564)

**Figure S1. Tyrosine phosphorylation of CD95 is essential for increased cell killing by the combination of a MEK1/2 inhibitor and 17DMAG.** HuH7 cells were transfected with plasmids to express GFP, GFP-CD95 or GFP-CD95 YY-FF. Twenty four h after transfection cells were treated with vehicle (DMSO) or the indicated concentrations of MEK1/2 inhibitor AZD6244 (6244, 100 nM) and/or 17DMAG (DMAG, 100 nM) and/or obatoclax (GX, 50 nM). Cells were isolated 24h after drug exposure and cell viability determined by trypan blue exclusion (n = 3 +/- SEM).

**Figure S2. TRAIL enhances [MEK1/2 inhibitor + 17DMAG] toxicity to a greater extent than obatoclax.** HuH7, HEPG2 and HEP3B cells were treated with vehicle (DMSO) or the indicated concentrations of MEK1/2 inhibitor (6244, 100 nM) and/or 17DMAG (DMAG, 100 nM) and/or TRAIL (5 ng/ml) and/or obatoclax (GX, 50 nM). Cells were isolated 24h after drug exposure and cell viability determined by trypan blue exclusion (n = 3 +/- SEM).

S1

Percentage cell death

100  
80  
60  
40  
20  
0

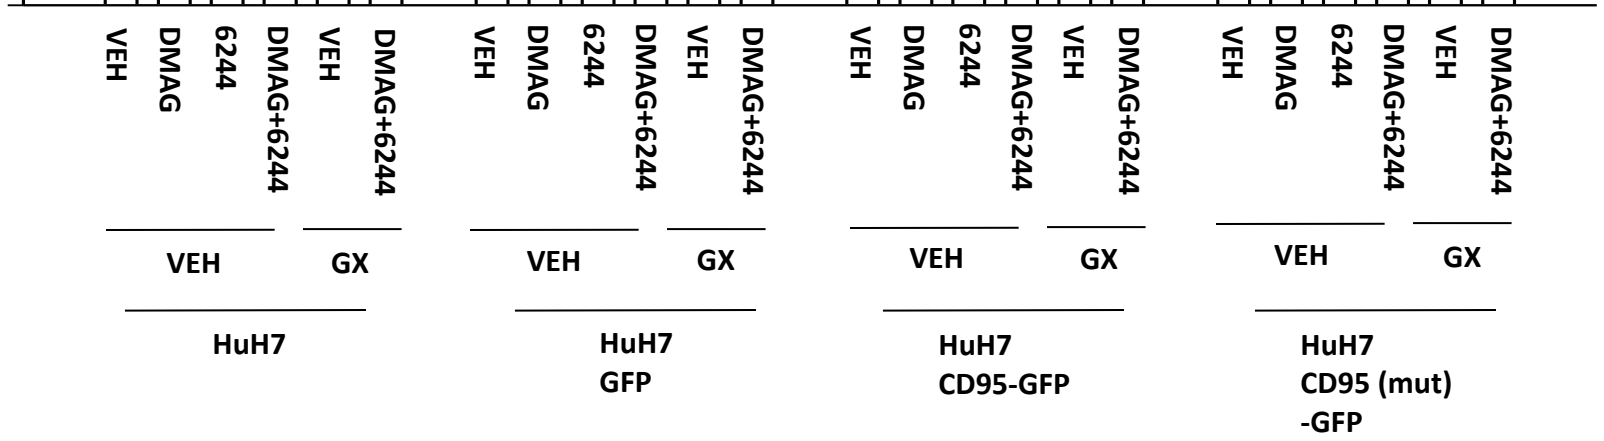

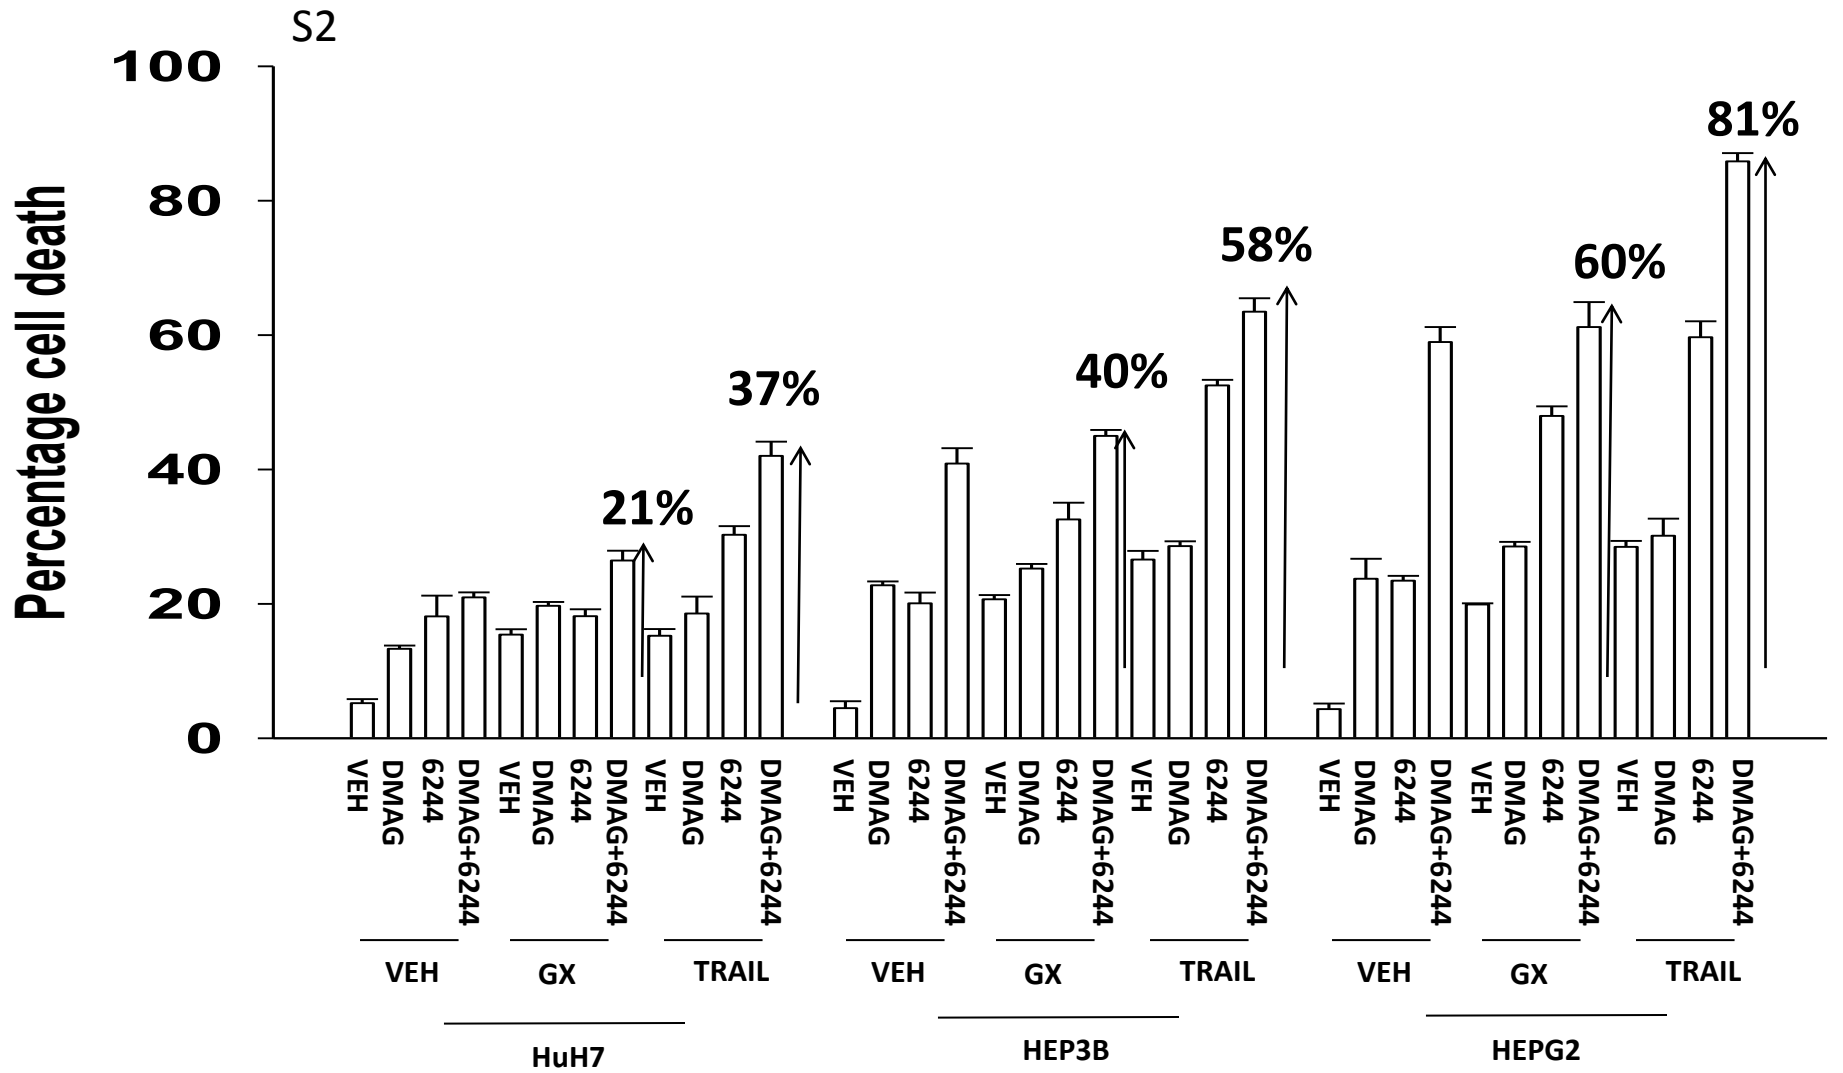

Supplement: NIHMS541456-supplement-Supplemental_data.pdf [file NIHMS541456-supplement-Supplemental_data.pdf]
